# Supplementary material for: Sustainable block copolymers of poly(limonene carbonate)
Source: Royal Society of Chemistry journal article supplement (doi:10.1039/d0py01685c), 2021-01-01
Supplement: d0py01685c1.pdf [file d0py01685c1.pdf]

Electronic Supplementary Material (ESI) for Polymer Chemistry. This journal is © The Royal Society of Chemistry 2020

## Electronic Supplementary Information

### Sustainable block copolymers of poly(limonene carbonate)

Simon Neumann,<sup>a</sup> Sophia Däbritz,<sup>a</sup> Sophie Fritze,<sup>a</sup> Lisa-Cathrin Leitner,<sup>a</sup> Aneesha Anand,<sup>a</sup>  
Andreas Greiner<sup>a,b</sup> and Seema Agarwal<sup>a,b\*</sup>

<sup>a</sup> University of Bayreuth, Macromolecular Chemistry II  
Universitätsstraße 30, 95440 Bayreuth, Germany  
E-mail: [seema.agarwal@uni-bayreuth.de](mailto:seema.agarwal@uni-bayreuth.de)

<sup>b</sup> University of Bayreuth, Bavarian Polymer Institute (BPI), Universitätsstraße 30, 95440 Bayreuth,  
Germany

## Terpolymerization of *trans*-limonene-oxide, (*D/L*)-lactide and CO<sub>2</sub> (One Pot ROCP)

**Table S1.** Experimental details of one-pot simultaneous polymerization of DLLA, LO and CO<sub>2</sub> using [(BDI)Zn-( $\mu$ -OAc)] catalyst.

| Lactide    | Feed ratio          | Polymer composition     | Lactide |      | LO   |      | Catalyst | THF/<br>Toluene | Yield | Yield |
|------------|---------------------|-------------------------|---------|------|------|------|----------|-----------------|-------|-------|
|            |                     |                         | m       | n    | V    | n    |          |                 |       |       |
|            | DLLA/<br>LO<br>mol% | r-DLLA<br>/r-LO<br>mol% | mg      | mmol | mL   | mmol | mg       | %               | %     | g     |
| <i>D/L</i> | 9/91                | 21/79                   | 264     | 1.8  | 3.0  | 18   | 24       | -               | 75    | 2.76  |
| <i>D/L</i> | 17/83               | 39/61                   | 538     | 3.7  | 3.0  | 18   | 24       | -               | 76    | 2.90  |
| <i>D/L</i> | 23/77               | 41/59                   | 792     | 5.5  | 3.0  | 18   | 24       | -               | 79    | 3.90  |
| <i>D/L</i> | 29/71               | 54/46                   | 1055    | 7.3  | 3.0  | 18   | 24       | -               | 82    | 3.33  |
| <i>D/L</i> | 34/66               | 60/40                   | 1318    | 9.1  | 3.0  | 18   | 24       | -               | 82    | 3.42  |
| <i>D/L</i> | 77/23               | 99/1                    | 1318    | 9.1  | 0.44 | 2.7  | 24       | 12              | 56    | 0.66  |
| <i>D/L</i> | 91/9                | 100/0                   | 1318    | 9.1  | 0.15 | 0.9  | 24       | 12              | 7     | 0.06  |
| <i>L</i>   | 20/80               | 29/71                   | 650     | 4.5  | 3.0  | 18   | 19       | 30              | 72    | 2.77  |

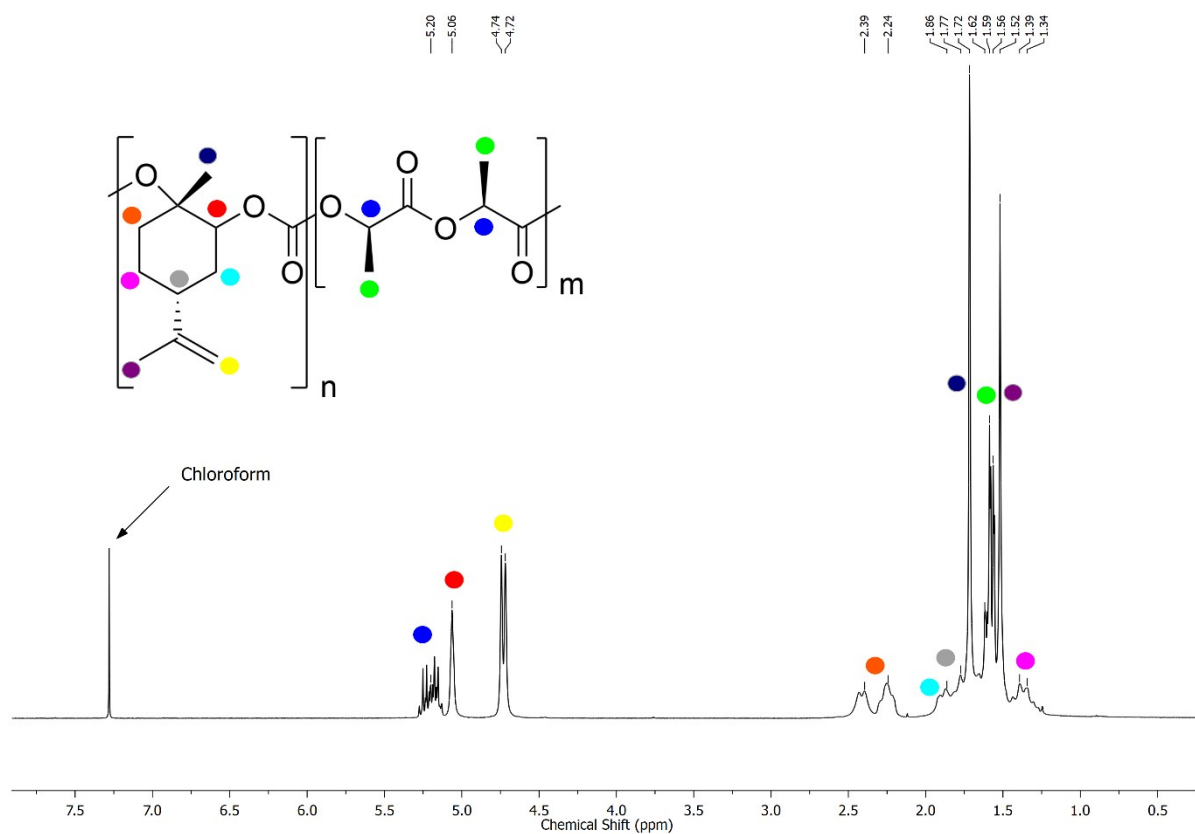

**Fig. S1** <sup>1</sup>H-NMR (300 MHz) of copolymer prepared from DLLA:LO = 29/71 mol% (entry 4, Table 1) in the feed, measured in CDCl<sub>3</sub>.

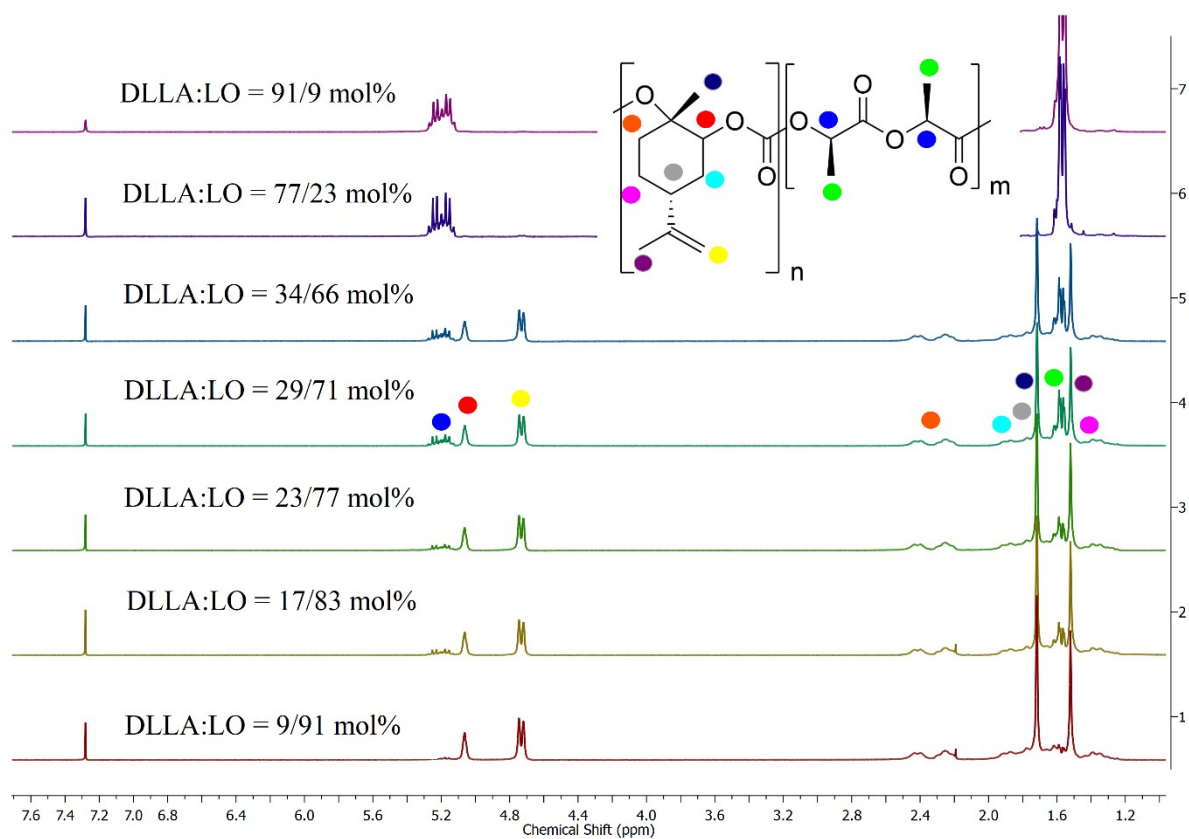

**Fig. S2**  $^1\text{H-NMR}$  (300 MHz) spectra of copolymer prepared from different molar ratio of DLLA and LO- $\text{CO}_2$  in the feed (Table 1), measured in  $\text{CDCl}_3$ .

$^1\text{H-NMR}$  (300 MHz,  $\text{CDCl}_3$ ):  $\delta = 5.15\text{-}5.28$  (m, 1H, C(13)-H), 5.06 (s, 1H, C(5)-H), 4.71-4.75 (d,  $J = 9$  Hz, C(8)- $\text{H}_2$ ), 2.21-2.43 (m, 2H, C(1)- $\text{H}_2$ ), 1.86-1.91 (m, 2H, C(4)- $\text{H}_2$ ), 1.75-1.76 (m, 1H, C(3)-H), 1.69-1.73 (m, 3H, C(10)- $\text{H}_3$ ), 1.56-1.65 (m, 3H, C(14)- $\text{H}_3$ ), 1.50-1.52 (m, 3H, C(9)- $\text{H}_3$ ), 1.34-1.44 (m, 2H, C(2)- $\text{H}_2$ ) ppm.

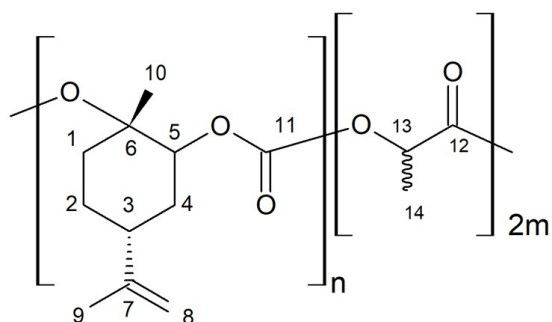

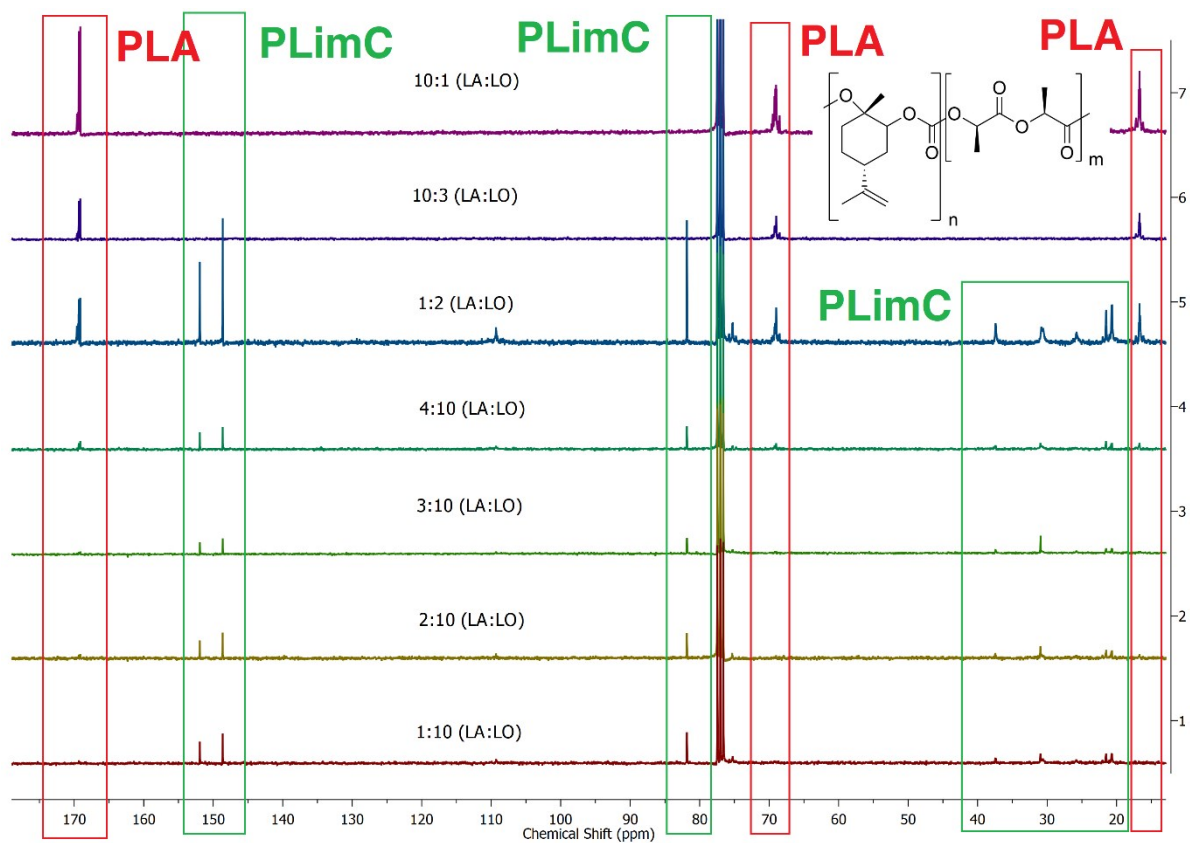

**Fig. S3**  $^{13}\text{C}$ -NMR spectra (CDCl<sub>3</sub>, 75 MHz) of copolymers of DLLA and LO-CO<sub>2</sub> with different feed ratios.

$^{13}\text{C}$ -NMR (300 MHz, CDCl<sub>3</sub>):  $\delta$  = 169.13 (C12), 151.92 (C11), 148.63 (C8), 109.3 (C7), 81.83 (C6), 75.32 (C5), 68.98 (C13), 37.43 (C3), 30.96 (C1), 21.54 (C4), 20.84 (C2), 20.65 (C10), 20.59 (C9), 16.07 (C14) ppm.

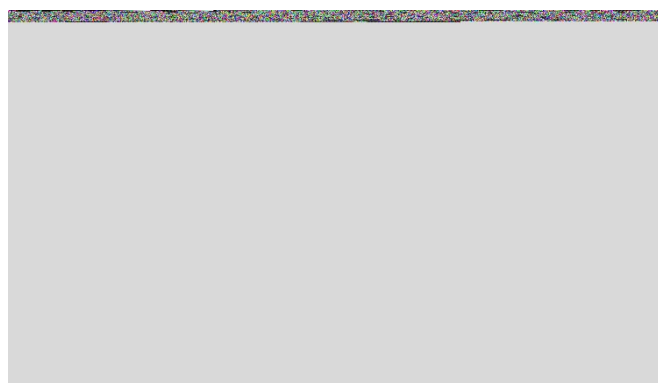

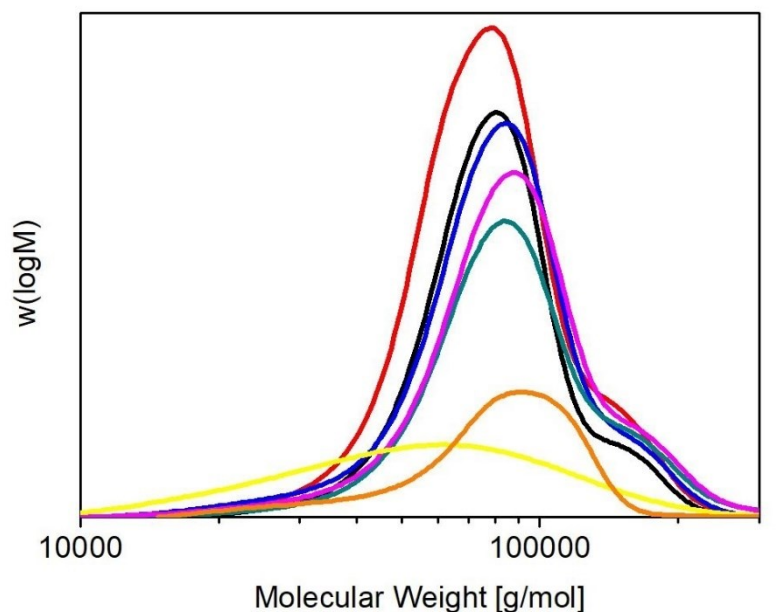

**Fig. S4** CHCl<sub>3</sub>-GPC traces of copolymers of DLLA and LO-CO<sub>2</sub> with different feed ratios. Molecular weight ( $M_n$ ) and dispersity ( $D$ ) were determined from these curves cannot be taken precisely due to the non-unimodal nature of the curves. DLLA:LO = 9/91 mol% (black), DLLA:LO = 17/83 mol% (red), DLLA:LO = 23/77 mol% (blue), DLLA:LO = 29/71 mol% (green), DLLA:LO = 34/66 mol% (pink), DLLA:LO = 77/23 mol% (yellow), ), DLLA:LO = 91/9 mol% (orange).

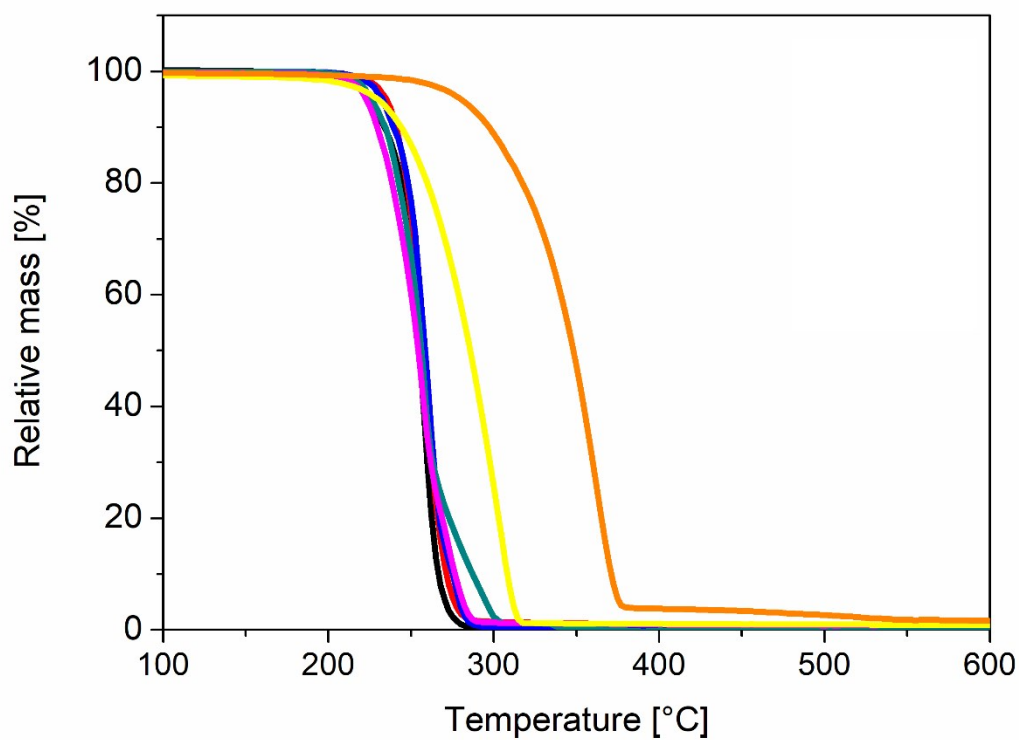

**Fig. S5** TGA thermograms of copolymers of DLLA and LO-CO<sub>2</sub> with different feed ratios, measured under nitrogen with 10K/min. DLLA:LO = 9/91 mol% (black), DLLA:LO = 17/83 mol% (red), DLLA:LO = 23/77 mol% (blue), DLLA:LO = 29/71 mol% (green), DLLA:LO = 34/66 mol% (pink), DLLA:LO = 77/23 mol% (yellow), ), DLLA:LO = 91/9 mol% (orange).

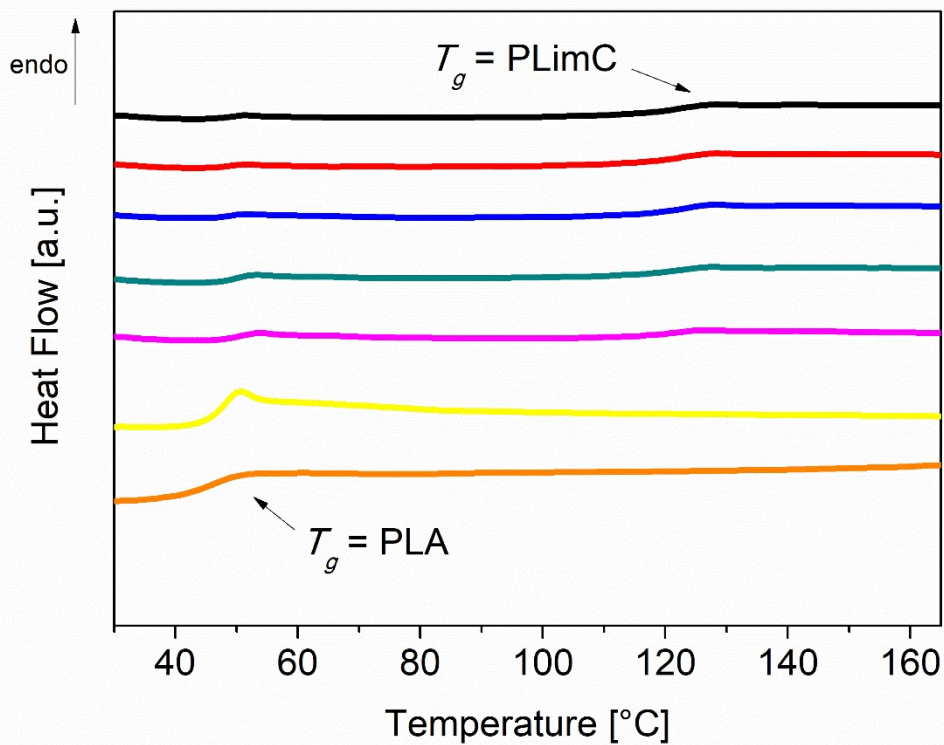

**Fig. S6** DSC thermograms of copolymers of DLLA and LO-CO<sub>2</sub> with different feed ratios. The displayed traces correspond to the second heating curve measured at 10 K min<sup>-1</sup> under nitrogen. DLLA:LO = 9/91 mol% (black), DLLA:LO = 17/83 mol% (red), DLLA:LO = 23/77 mol% (blue), DLLA:LO = 29/71 mol% (green), DLLA:LO = 34/66 mol% (pink), DLLA:LO = 77/23 mol% (yellow), , DLLA:LO = 91/9 mol% (orange).



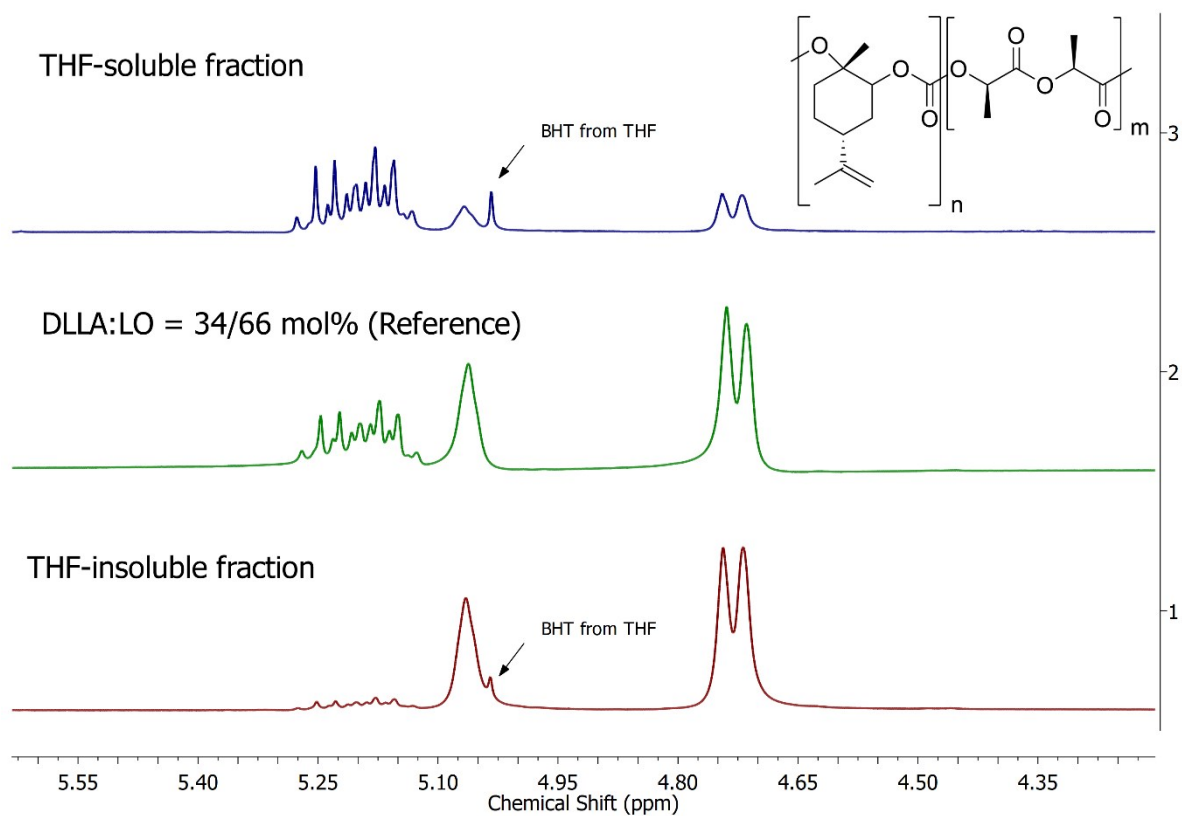

**Fig. S7**  $^1\text{H-NMR}$  spectrum ( $\text{CDCl}_3$ , 300 MHz) of copolymers (DLLA/ LO = 34/66 mol%) designated as reference in the figure) and the corresponding  $^1\text{H-NMR}$  spectra of THF-soluble fraction and THF-insoluble fraction. Copolymer composition: DLLA/LO mol%: Reference: 60/40; THF soluble fraction: 87/13; THF insoluble fraction: 18/82.

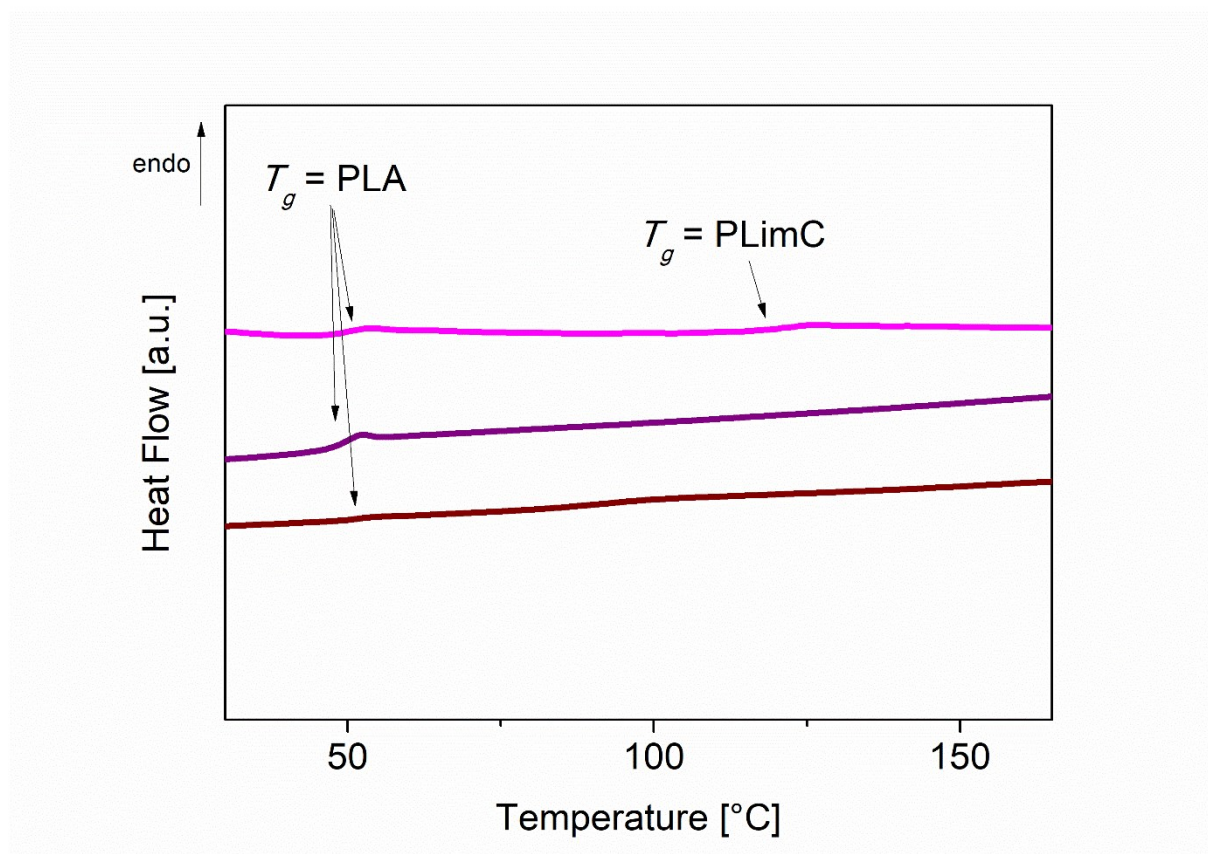

**Fig. S8** DSC thermograms of PLimC-*b*-PDLLA block copolymers (DLLA/ LO = 34/66 mol%) and the corresponding DSC thermograms of THF-soluble fraction (brown) and THF-insoluble fraction (violet). The displayed traces correspond to the second heating curve measured at 10 K min<sup>-1</sup>.

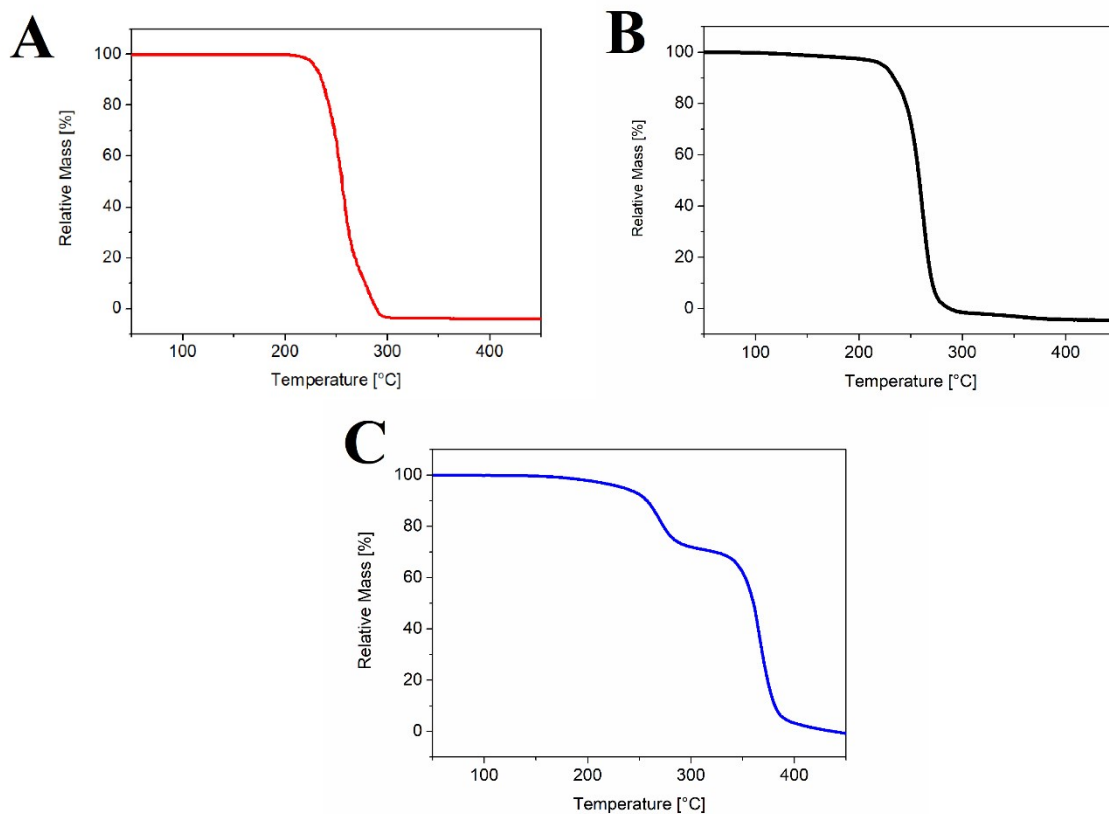

**Fig. S9** TGA thermograms of PLimC-*b*-PDLLA block copolymers (DLLA/ LO = 34/66 mol%) and the corresponding TGA thermograms of the THF-soluble fraction and THF-insoluble fraction. A) Reference with 40 mol % PLimC/ 60 mol% PDLLA. B) THF-insoluble fraction with 82 mol% PLimC/18 mol% PDLLA. C) THF-soluble fraction with 13 mol% PLimC/ 87 mol % PDLLA.

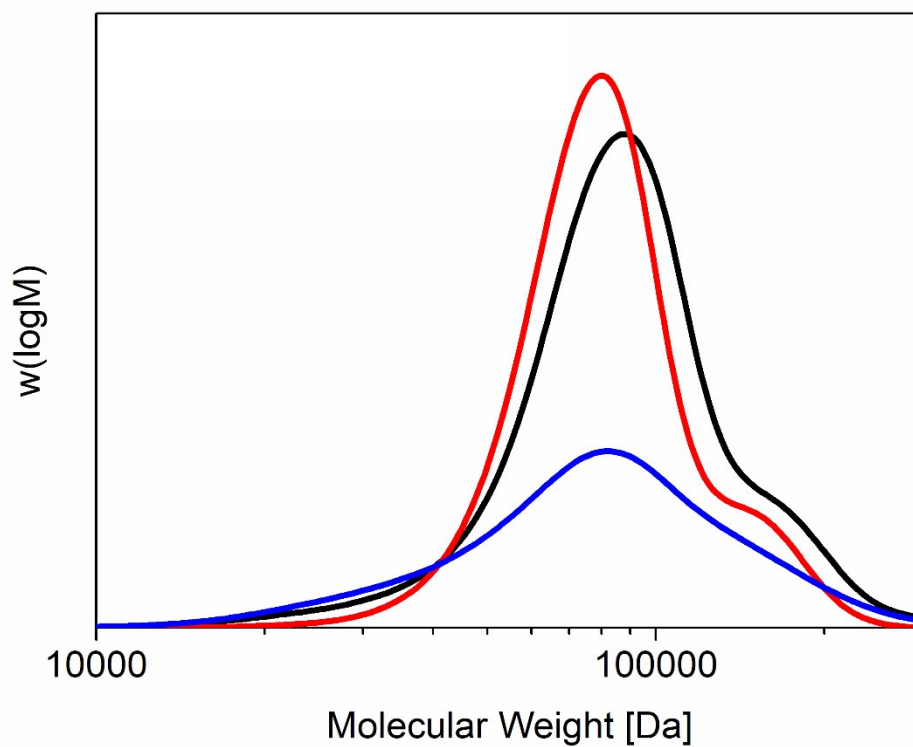

**Fig. S10**  $\text{CHCl}_3$ -GPC traces of PLimC-*b*-PDLLA block copolymers (DLLA/ LO = 34/66 mol%) and the corresponding  $\text{CHCl}_3$ -GPC traces of the THF-soluble fraction and THF-insoluble fraction. Molecular weight ( $M_n$ ) and dispersity ( $D$ ) were determined by  $\text{CHCl}_3$ -GPC, calibrated with narrowly distributed polystyrene standards.

*TEM micrographs of PLimC-b-PDLLA block copolymers*

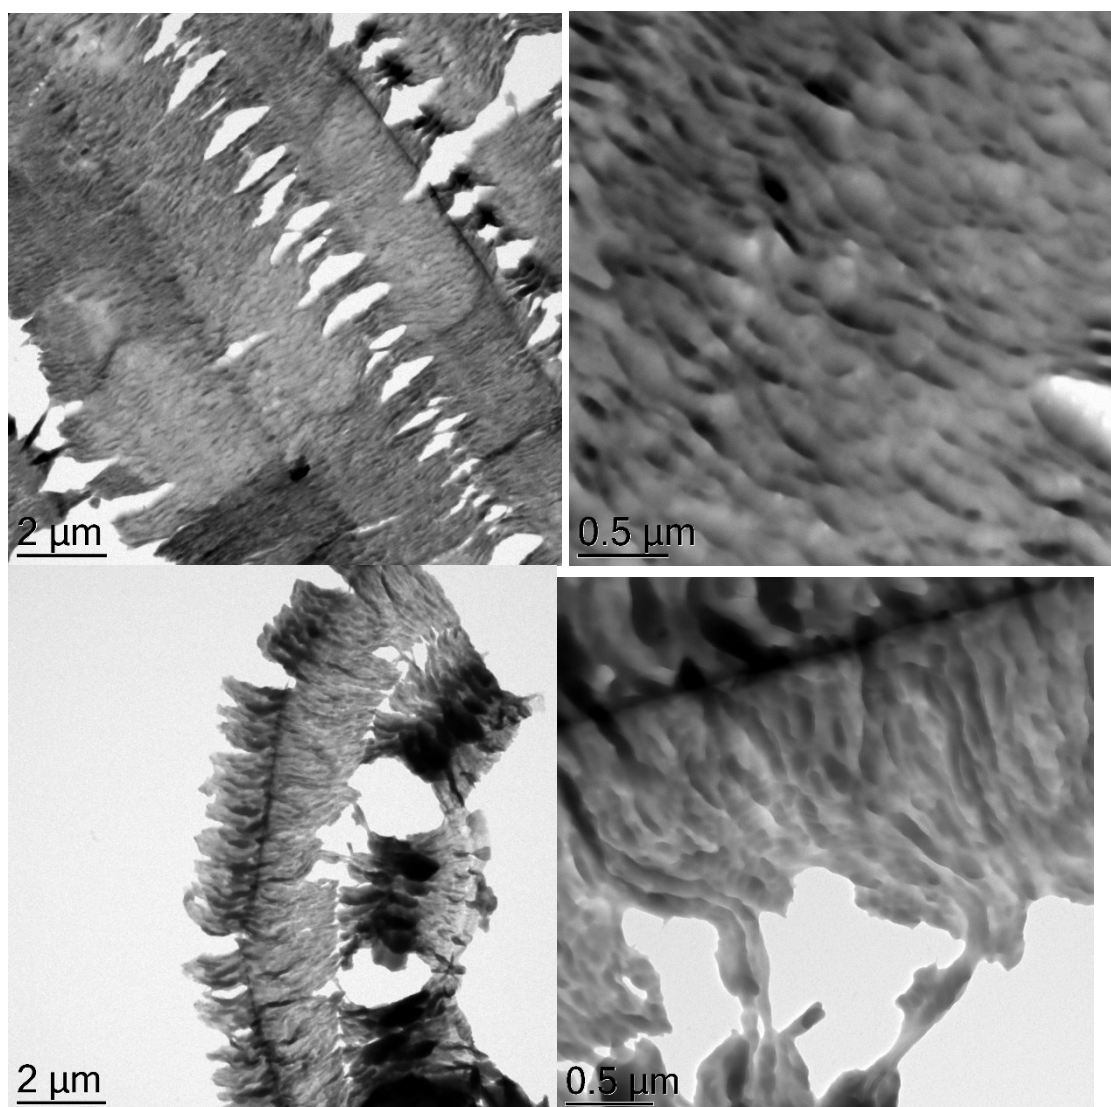

**Fig. S11** TEM micrographs of PLimC-*b*-PDLLA block copolymers (DLLA/LO = 17/83 mol%)  
with PLimC/PDLLA = 39/61 mol%.

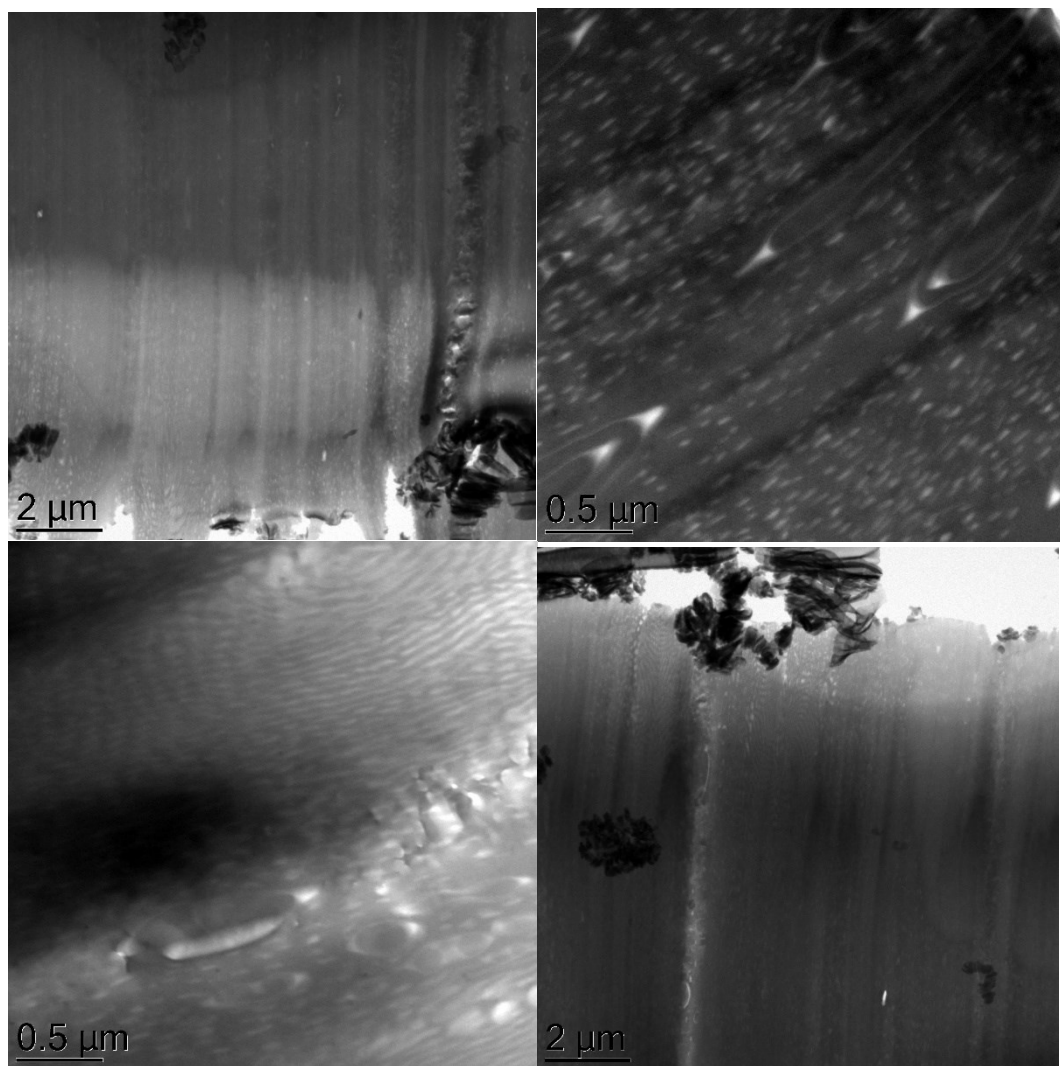

**Fig. S12** TEM micrographs of PLimC-*b*-PDLLA block copolymers (DLLA/LO = 23/77 mol%) with PLimC/PDLLA = 59/41 mol%.

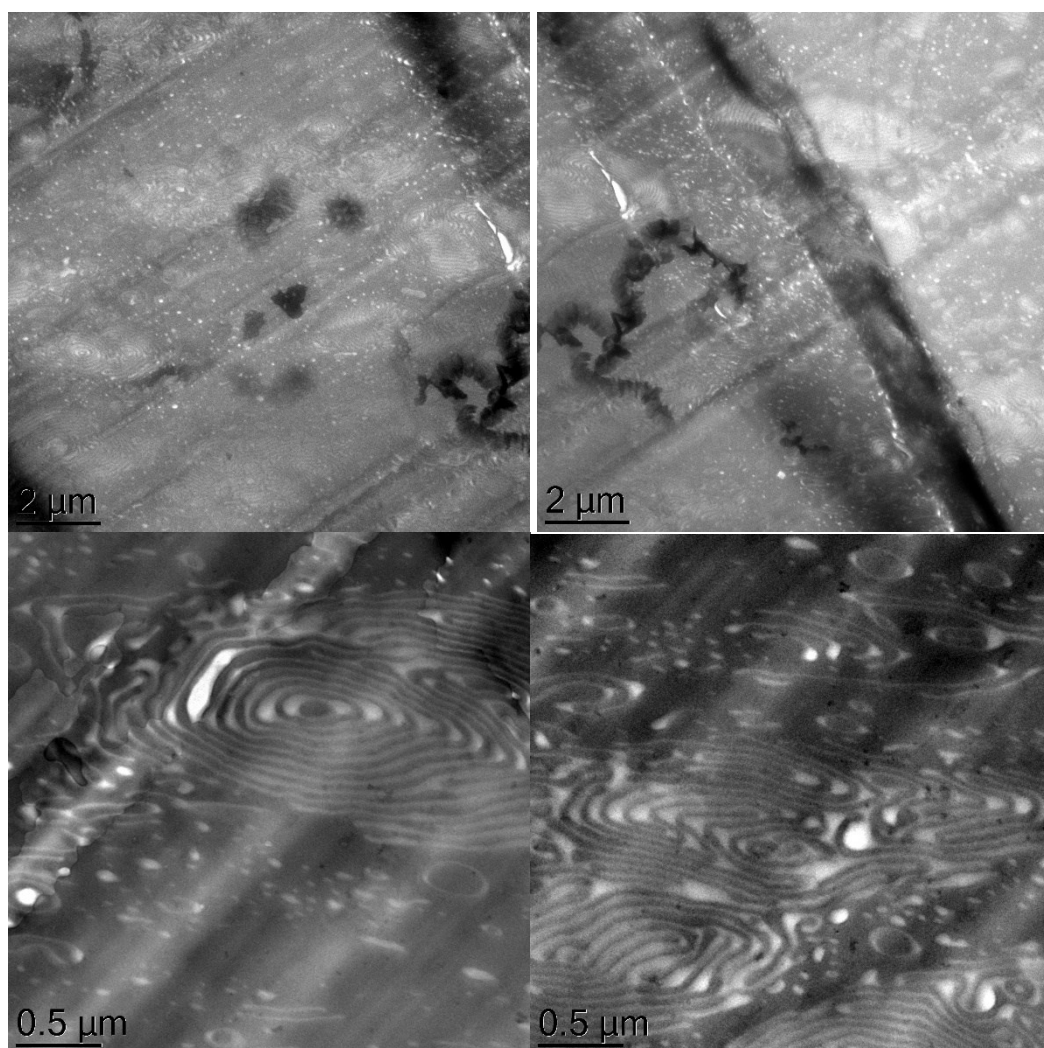

**Fig. S13** TEM micrographs of PLimC-*b*-PDLLA block copolymers (DLLA/ LO = 29/71 mol%) with PLimC/PDLLA = 46/54 mol%.



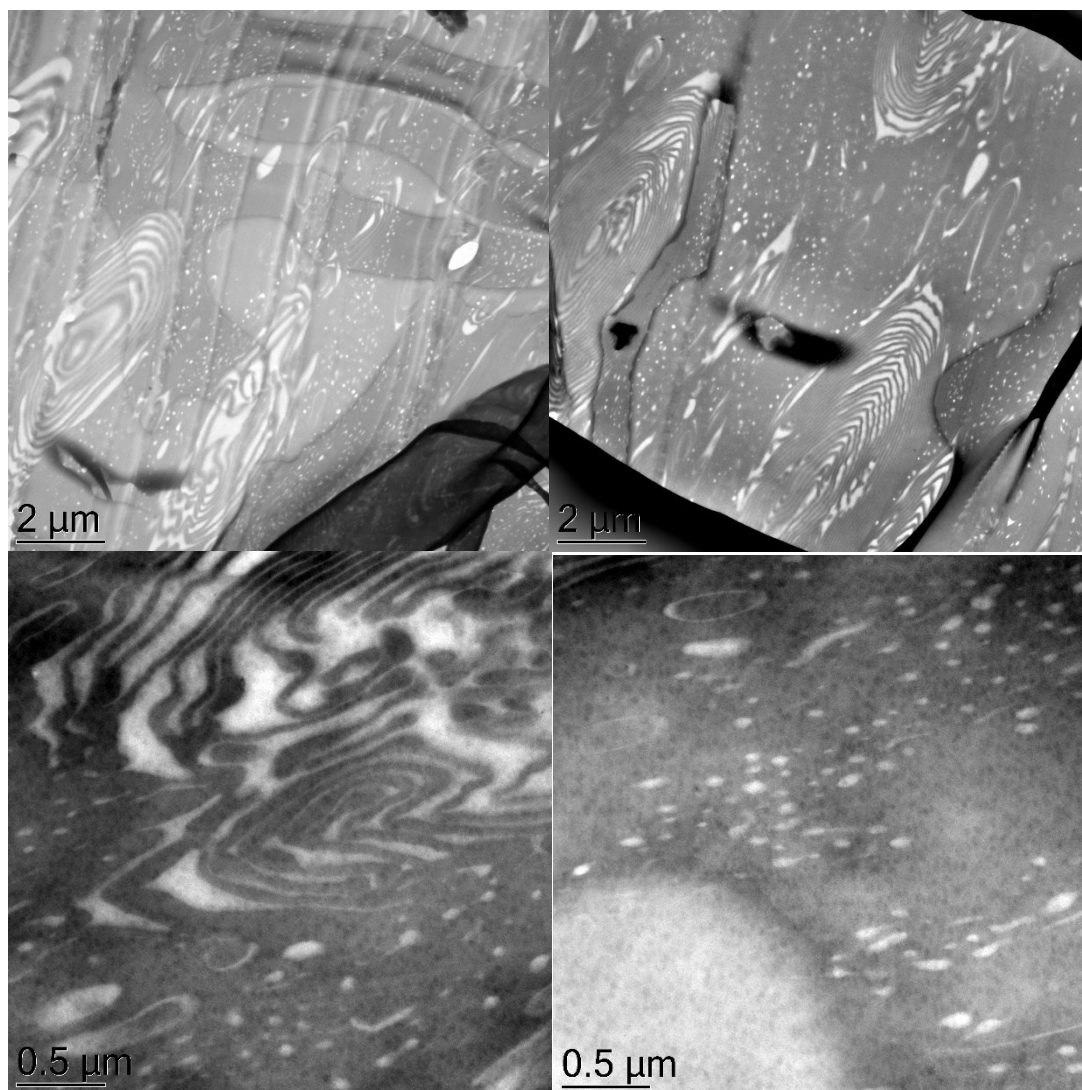

**Fig. S14** TEM micrographs of PLimC-*b*-PDLLA block copolymers (DLLA/ LO = 34/66 mol%) with PLimC/PDLLA = 40/60 mol%.



## Sequential terpolymerization of *trans*-limonene-oxide, (*L*)-lactide and CO<sub>2</sub>

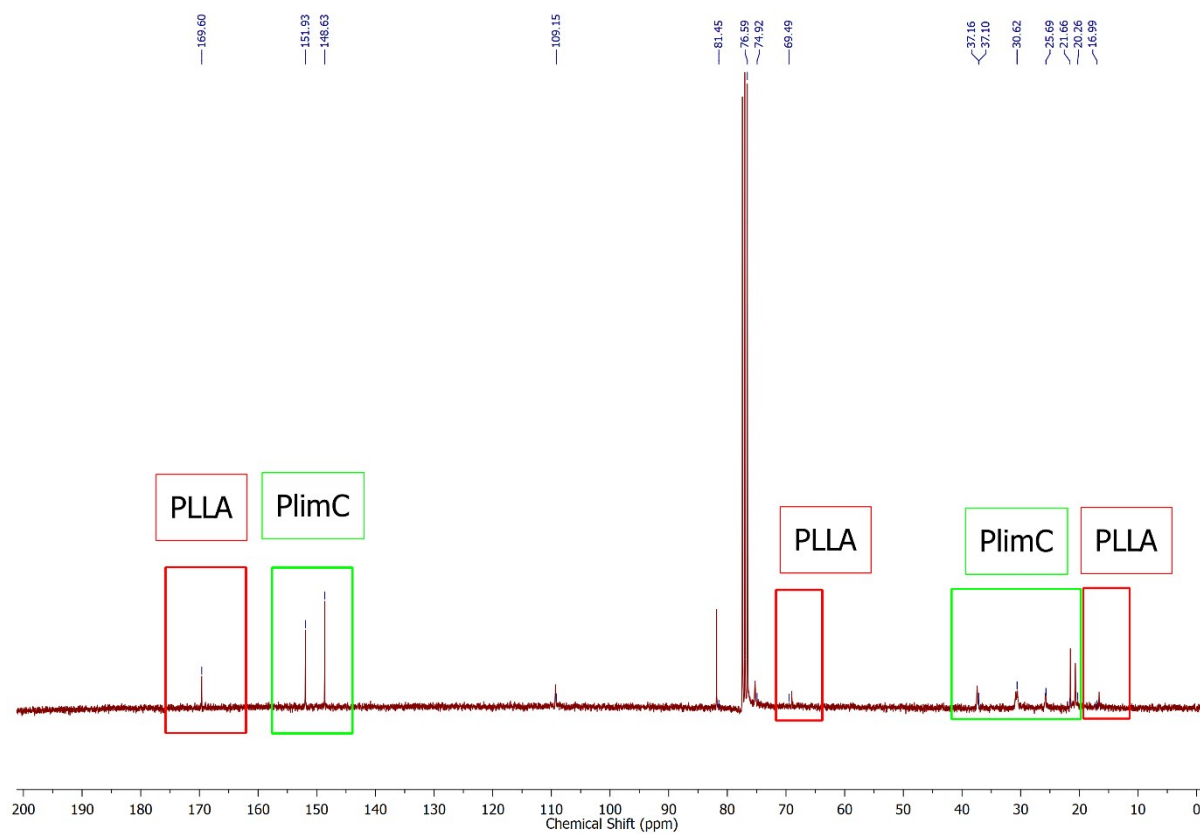

**Fig. S15** <sup>13</sup>C-NMR (CDCl<sub>3</sub>, 75 MHz) spectrum of PLimC-*b*-PLLA block copolymer (feed ratio: LA/LO = 20/80 mol%) with a composition of PLimC/PLLA = 29/71 mol%, measured in CDCl<sub>3</sub>.

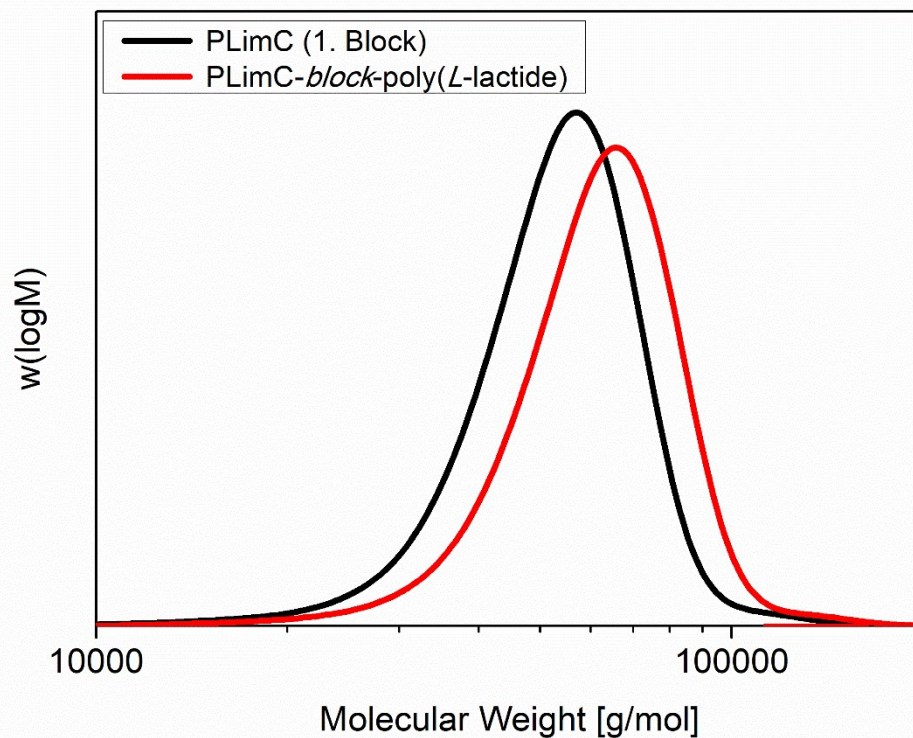

**Fig. S16**  $\text{CHCl}_3$ -GPC traces of PLimC-*b*-PLLA block copolymer (feed ratio: LA/LO = 20/80 mol%) with a composition of PLimC/PLLA = 29/71 mol%. Molecular weight ( $M_n$ ) and dispersity ( $D$ ) were determined by  $\text{CHCl}_3$ -GPC, calibrated with narrowly distributed polystyrene standards.

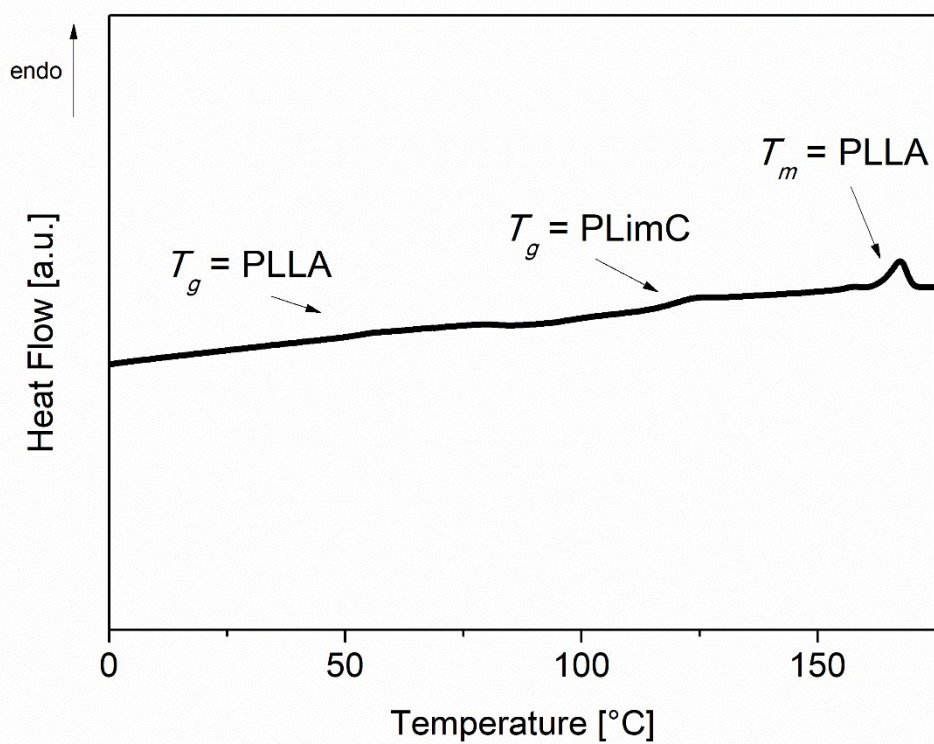

**Fig. S17** DSC thermogram of PLimC-*b*-PLLA block copolymer (feed ratio: LA/LO = 20/80 mol%) with a composition of PLimC/PLLA = 29/71 mol%. The displayed trace corresponds to the second heating curve measured at 10 K min<sup>-1</sup> under nitrogen.

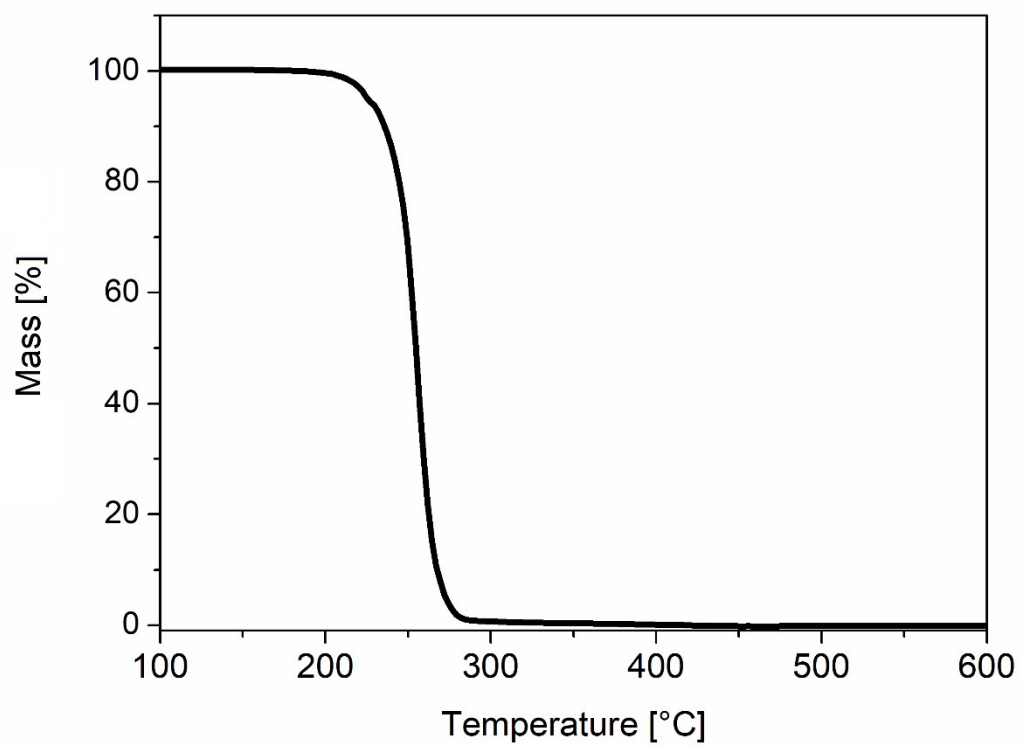

**Fig. S18** TGA thermogram for PLimC-*b*-PLLA block copolymer (feed ratio: LA/LO = 20/80 mol%) with a composition of PLimC/PLLA = 29/71 mol%, measured under nitrogen with 10K/min.

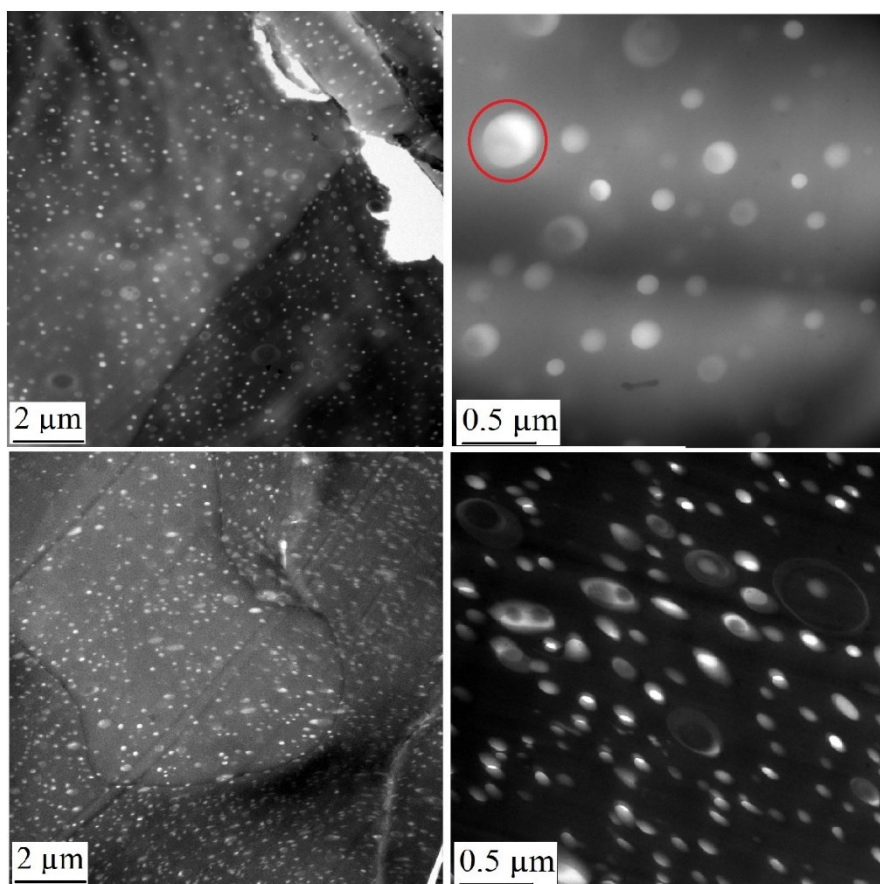

Spheres (S)

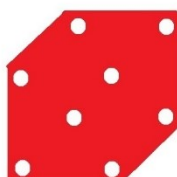

**Fig. S19** TEM micrographs of PLImC-*b*-PLLA block copolymer with PLImC/PLLA = 71/29 mol%. PLImC is selectively stained with OsO<sub>4</sub> vapor.

## Terpolymerization of *trans*-limonene-oxide, dihexyl-substituted lactide and CO<sub>2</sub> (Sequential ROCP)

**Table S2.** Experimental details of sequential polymerization of diHLA, LO and CO<sub>2</sub> using [(BDI)Zn-(μ-OAc)] catalyst.

| Sample | Feed Ratio | Polymer Composition | Lactide |      | LO   |      | Catalyst | Toluene | Yield |
|--------|------------|---------------------|---------|------|------|------|----------|---------|-------|
|        |            |                     | m       | n    | V    | n    |          |         |       |
| Unit   | mol%       | mol%                | mg      | mmol | mL   | mmol | mg       | mL      | %     |
| 10     | 23/77      | 29/71               | 511     | 1.80 | 1.0  | 6.1  | 33       | 6       | 89    |
| 11     | 13/87      | 50/50               | 260     | 0.91 | 1.0  | 6.1  | 33       | 11      | n.d.  |
| 12     | 50/50      | 62/38               | 993     | 3.49 | 0.57 | 3.5  | 20       | 5       | 74    |

**Table S3.** Overview of the synthesized PLimC and PdiHLA block copolymers in terms of feed ratio, polymer composition, molecular weight, and thermal properties.

| Monomer Lactide | Reaction Type | Feed Ratio diHLA/LO | r-diHLA /r-LO | $M_n^a$ | $D^a$ | $T_g^b$ | $T_g^b$ | $T_m^b$ | $T_{5\%}^c$ | $T_{max,1}^d$ | $T_{max,2}^d$ |
|-----------------|---------------|---------------------|---------------|---------|-------|---------|---------|---------|-------------|---------------|---------------|
|                 |               |                     |               |         |       | PLimC   | PE      | PE      |             | PLimC         | PE            |
|                 |               | mol%                | mol%          | kDa     |       | °C      | °C      | °C      | °C          | °C            | °C            |
| diHLA           | Sequential    | 23/77               | 29/71         | 35      | 1.40  | -       | -36     | -       | 228         | 254           | 329           |
| diHLA           | Sequential    | 13/87               | 50/50         | 14      | 1.20  | -       | -39     | -       | 224         | 247           | 299           |
| diHLA           | Sequential    | 50/50               | 62/38         | 49      | 1.40  | 106     | -38     | -       | 229         | 254           | 289           |

<sup>a</sup>GPC:  $M_n$  and  $D$  were determined by CHCl<sub>3</sub>-GPC, calibrated with narrowly distributed polystyrene standards.

<sup>b</sup>DSC:  $T_g$  and  $T_m$  were determined from the second heating traces (scanning rate 10 K min<sup>-1</sup>).

<sup>c</sup>TGA:  $T_{5\%}$  was determined with a heating rate of 10 K min<sup>-1</sup> under N<sub>2</sub> atmosphere.

<sup>d</sup>TGA:  $T_{max,1}$  and  $T_{max,2}$  were determined from the 1<sup>st</sup> derivative of the TGA trace.

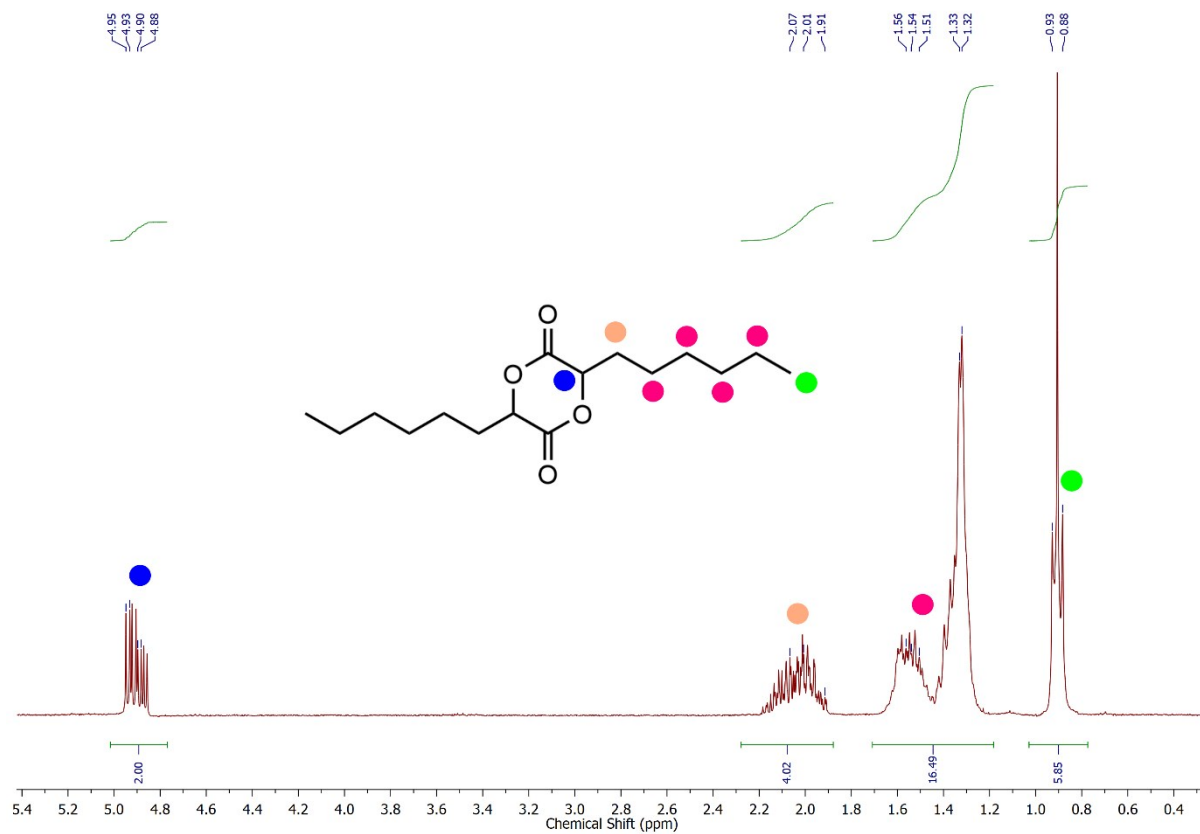

**Fig. S20** <sup>1</sup>H-NMR spectrum (CDCl<sub>3</sub>, 300 MHz) of monomer dihexyl-substituted lactide (diHLA).

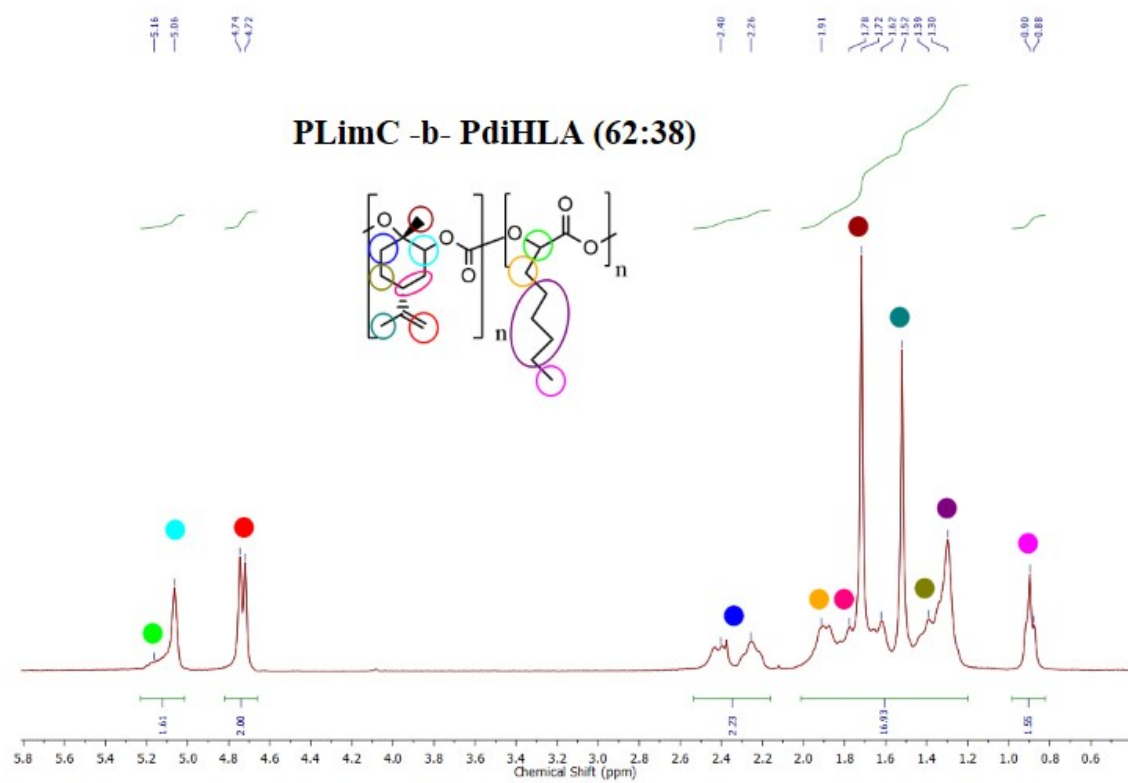

**Fig. S21** <sup>1</sup>H-NMR spectrum (CDCl<sub>3</sub>, 300 MHz) of PLimC-*b*-PdiHLA block copolymer (feed ratio: diHLA/LO = 50/50 mol%) with a composition of PLimC/PdiHLA = 62/38 mol%.



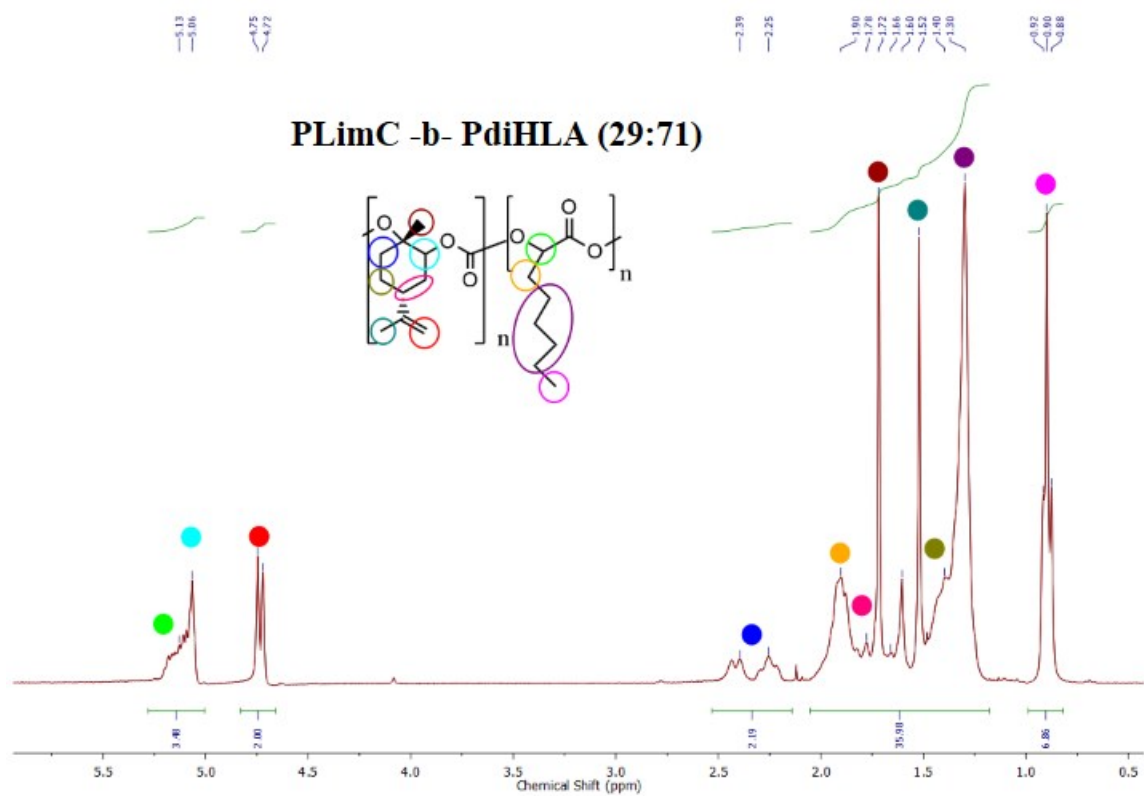

**Fig. S22**  $^1\text{H-NMR}$  spectrum ( $\text{CDCl}_3$ , 300 MHz) of PLimC-*b*-PdiHLA block copolymer (feed ratio: diHLA/LO = 22/78 mol%) with a composition of PLimC/PdiHLA = 29/71 mol%.

GPC traces of P*LimC*-*b*-P*diHLA* block copolymers

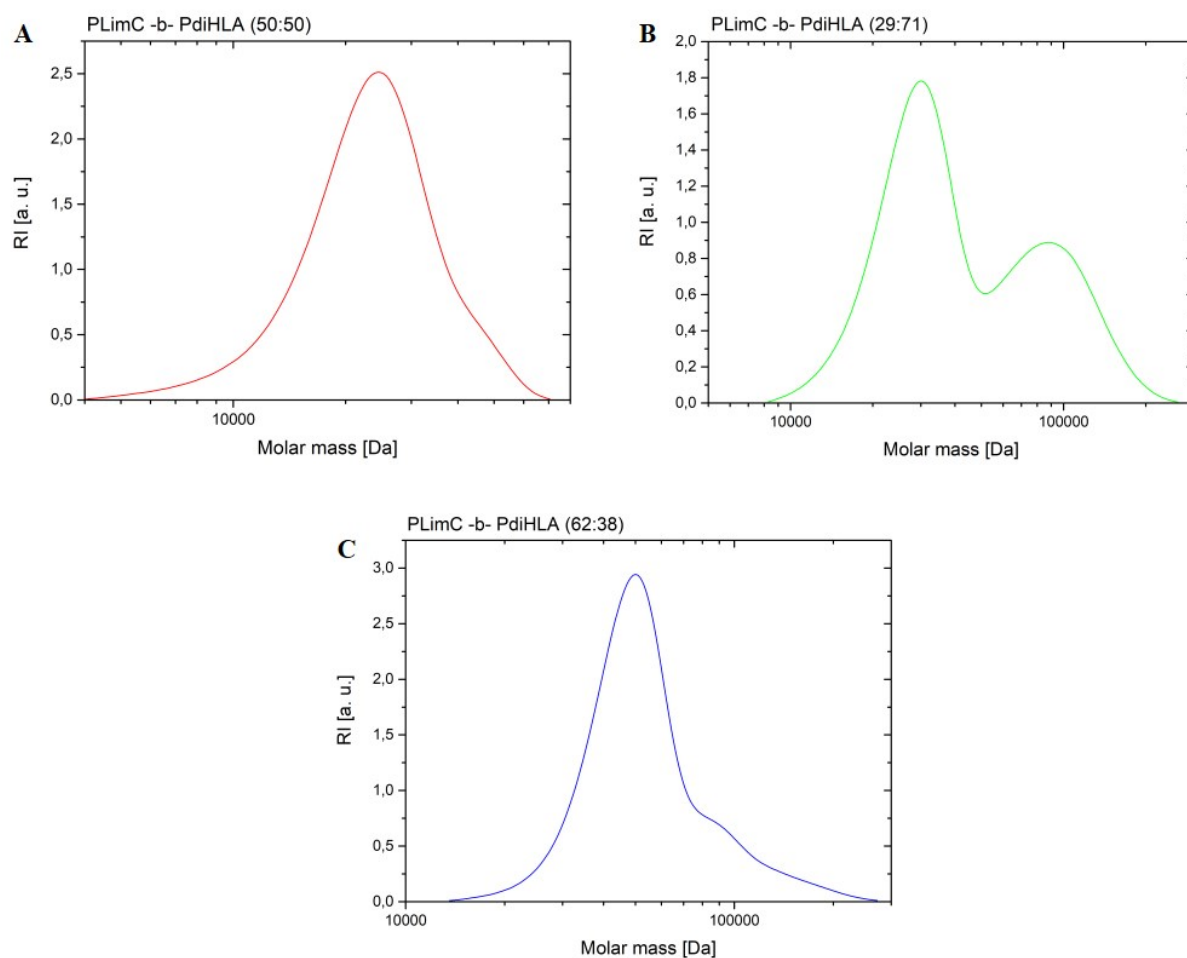

**Fig. S23** CHCl<sub>3</sub>-GPC traces of P*LimC*-*b*-P*diHLA* block copolymers. A) P*LimC*-*b*-P*diHLA* (50:50) block copolymer,  $M_n = 14.210$  g/mol,  $D = 1.4$ . B) P*LimC*-*b*-P*diHLA* (29:71) block copolymer,  $M_n = 35.070$  g/mol,  $D = 1.5$ . C) P*LimC*-*b*-P*diHLA*. (62:38) block copolymer,  $M_n = 48.980$  g/mol,  $D = 1.2$ . Molecular weight ( $M_n$ ) and dispersity ( $D$ ) were determined by CHCl<sub>3</sub>-GPC, calibrated with narrowly distributed polystyrene standards.

DSC thermogram of PLimC-*b*-PdiHLA block copolymer

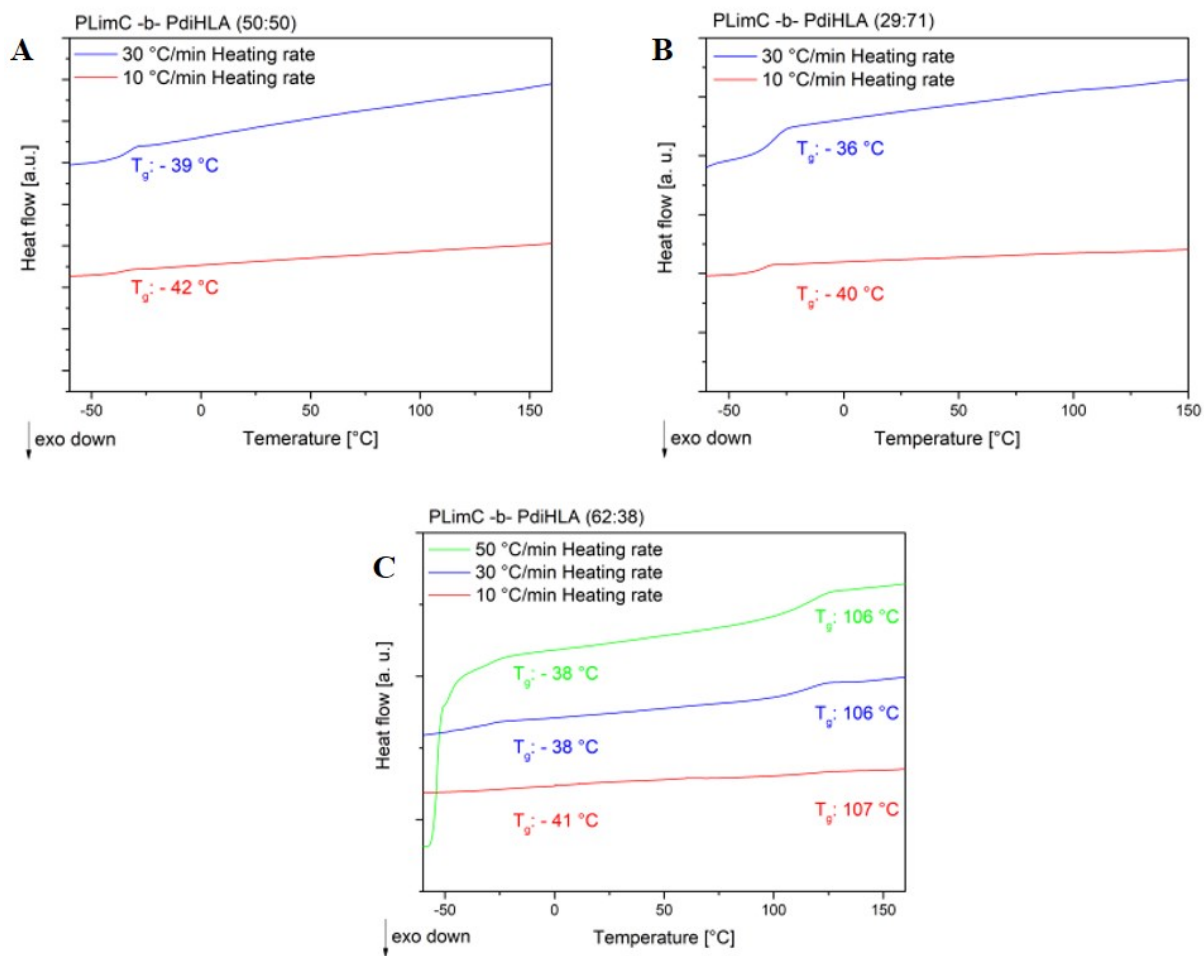

**Fig. S24** DSC thermograms of PLimC-*b*-PdiHLA block copolymers. A) PLimC-*b*-PdiHLA (50:50) block copolymer. B) PLimC-*b*-PdiHLA (29:71) block copolymer. C) PLimC-*b*-PdiHLA (62:38) block copolymer with a heating rate of 10, 30 and 50 °C/min.

TGA thermograms of PLimC-*b*-PdiHLA block copolymer

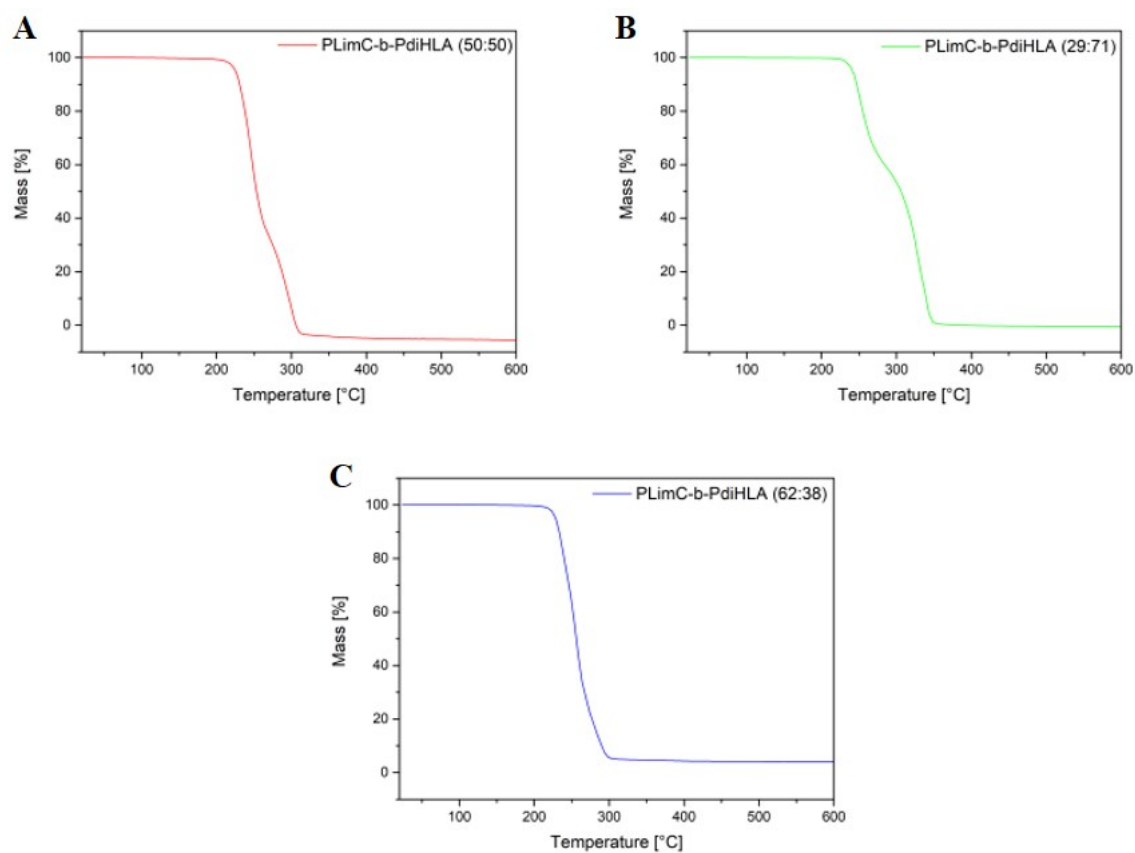

**Fig. S25** TGA thermograms of PLimC-*b*-PdiHLA block copolymer. A) PLimC-*b*-PdiHLA (50:50) block copolymer,  $T_{\text{onset}}$  of PLimC degradation: 226 °C,  $T_{\text{onset}}$  of PdiHLA degradation: 260 °C. B) PLimC-*b*-PdiHLA (29:71) block copolymer,  $T_{\text{onset}}$  of PLimC degradation: 247 °C,  $T_{\text{onset}}$  of PdiHLA degradation: 306 °C. C) PLimC-*b*-PdiHLA (62:38) block copolymer,  $T_{\text{onset}}$  of PLimC degradation: 226 °C,  $T_{\text{onset}}$  of PdiHLA degradation: 260 °C. The displayed traces were measured under nitrogen with 10K/min.
